# Supplementary material for: Increased Abundance of Clostridium and Fusobacterium in Gastric Microbiota of Patients with Gastric Cancer in Taiwan
Source: Sci Rep. 2018 Jan 9;8:158. doi: 10.1038/s41598-017-18596-0 (PMC5760541; doi:10.1038/s41598-017-18596-0)
Supplement: Supplementary file 1 — Supplementary Information [file 41598_2017_18596_MOESM1_ESM.pdf]

## **Supplementary data**

Increased Abundance of *Clostridium* and *Fusobacterium* in Gastric Microbiota of Patients with Gastric Cancer in Taiwan

Yung-Yu Hsieh, Shui-Yi Tung, Hung-Yu Pan, Chih-Wei Yen, Huang-Wei Xu, Ying-Jhen Lin, Yi-Fang Deng, Wan-Ting Hsu, Cheng-Shyong Wu, Chin Li

Table S1. The percentages of bacteria identified by 16S ribosomal DNA sequencing

| genus                     | gastritis |        |        |        |        |        |        |        |        | intestinal metaplasia |        |        |        |        |        |        |        | cancer |        |        |        |        |        |        |        |        |        |
|---------------------------|-----------|--------|--------|--------|--------|--------|--------|--------|--------|-----------------------|--------|--------|--------|--------|--------|--------|--------|--------|--------|--------|--------|--------|--------|--------|--------|--------|--------|
| unclassified              | 21.48%    | 13.66% | 7.10%  | 9.96%  | 18.61% | 4.31%  | 0.67%  | 0.64%  | 0.95%  | 14.41%                | 19.34% | 3.88%  | 20.26% | 11.14% | 4.48%  | 5.48%  | 7.38%  | 8.65%  | 13.38% | 20.16% | 16.87% | 4.23%  | 11.61% | 16.23% | 11.64% | 8.28%  | 12.33% |
| low abundance             | 8.19%     | 9.08%  | 8.92%  | 2.18%  | 14.78% | 1.03%  | 1.23%  | 0.83%  | 3.11%  | 7.96%                 | 5.58%  | 3.81%  | 4.89%  | 9.97%  | 7.47%  | 0.36%  | 10.26% | 3.36%  | 13.91% | 11.12% | 1.46%  | 9.87%  | 14.41% | 7.73%  | 0.64%  | 1.78%  | 0.94%  |
| <i>Acinetobacter</i>      |           |        |        |        |        |        |        |        |        | 21.07%                |        |        |        | 2.09%  |        |        |        |        |        |        |        |        |        |        |        |        |        |
| <i>Aeribacillus</i>       | 11.00%    | 5.53%  | 6.23%  |        | 3.32%  |        |        |        | 1.33%  | 3.02%                 |        |        |        | 3.44%  | 2.72%  |        | 10.67% |        | 6.76%  | 5.64%  |        |        | 2.04%  |        |        |        |        |
| <i>Alloprevotella</i>     | 4.95%     | 2.53%  |        |        |        | 0.31%  |        |        |        |                       |        |        |        |        |        |        |        |        |        |        |        | 1.25%  |        |        |        |        |        |
| <i>Bacillus</i>           | 1.21%     |        |        |        |        |        |        |        |        |                       |        |        |        |        |        |        |        |        |        | 1.05%  |        |        |        |        |        |        |        |
| <i>Bacteroides</i>        |           |        |        |        |        |        |        |        |        |                       |        |        |        |        |        |        |        |        |        | 1.37%  |        |        |        |        |        |        |        |
| <i>Bifidobacterium</i>    |           |        |        |        |        |        |        |        |        |                       |        |        |        |        |        |        |        |        |        |        |        |        |        |        |        |        | 0.12%  |
| <i>Bradyrhizobium</i>     |           |        |        |        | 3.60%  |        |        |        |        |                       |        |        |        |        |        |        |        |        |        |        |        | 1.57%  |        |        |        |        |        |
| <i>Brevundimonas</i>      | 2.20%     |        |        |        |        |        |        |        |        |                       |        |        |        |        |        |        |        |        |        |        |        |        |        |        |        |        |        |
| <i>Burkholderia</i>       |           |        |        | 60.19% |        |        |        |        |        |                       |        | 85.88% |        |        | 6.09%  |        |        | 52.95% |        | 47.89% |        |        |        |        |        |        |        |
| <i>Campylobacter</i>      | 3.04%     | 1.57%  |        |        |        | 0.34%  |        |        |        |                       |        |        |        | 3.55%  |        |        |        |        |        |        |        | 1.41%  | 1.54%  | 0.11%  | 2.35%  |        |        |
| <i>Caulobacter</i>        |           |        |        | 1.45%  |        |        |        |        |        |                       |        |        |        |        |        |        |        |        |        |        |        |        |        |        |        |        |        |
| <i>Clostridium</i>        |           |        |        |        | 1.74%  |        |        |        |        |                       |        |        |        |        |        |        |        |        |        | 3.67%  |        |        |        | 24.10% | 30.46% | 52.18% |        |
| <i>Corynebacterium</i>    |           |        |        | 7.09%  |        |        |        |        |        |                       |        |        |        | 1.04%  |        |        |        |        |        |        |        |        |        |        |        |        |        |
| <i>Cupriavidus</i>        |           |        |        |        |        |        |        |        |        |                       |        |        |        | 2.08%  |        |        |        |        |        |        |        |        |        |        |        |        |        |
| <i>Enterobacter</i>       |           | 30.29% | 41.59% |        |        | 0.28%  |        |        |        | 14.31%                |        |        |        |        |        |        | 40.42% |        | 29.81% | 23.89% |        |        |        | 0.25%  |        | 0.14%  |        |
| <i>Enterococcus</i>       |           |        |        |        |        |        |        |        |        |                       |        |        |        |        |        |        |        |        |        | 1.27%  |        |        |        |        |        |        |        |
| <i>Escherichia</i>        | 1.25%     |        |        |        |        |        |        |        |        |                       | 3.31%  |        |        |        | 2.66%  |        | 1.00%  |        | 1.00%  | 2.13%  |        |        |        |        |        |        |        |
| <i>Eubacterium</i>        |           |        |        |        |        |        |        |        |        |                       |        |        |        |        |        |        |        |        |        |        |        |        |        |        |        | 1.41%  |        |
| <i>Fusobacterium</i>      | 7.66%     | 1.37%  |        |        | 2.13%  | 0.49%  |        |        |        |                       |        |        |        | 3.44%  |        |        |        |        | 3.52%  |        | 37.28% | 8.31%  | 1.63%  | 0.42%  | 43.59% | 4.55%  |        |
| <i>Granulicatella</i>     |           |        |        |        | 1.17%  |        |        |        |        |                       |        |        |        |        |        |        |        |        |        |        |        |        |        |        |        |        |        |
| <i>Haemophilus</i>        | 3.60%     | 2.00%  |        |        |        | 0.22%  |        |        |        |                       |        | 2.03%  | 13.09% | 3.01%  | 2.67%  |        |        |        |        |        |        | 1.82%  | 1.09%  | 0.15%  |        | 1.02%  |        |
| <i>Halomonas</i>          | 3.03%     | 1.15%  |        |        | 1.72%  |        |        |        |        |                       |        |        |        | 1.18%  |        |        |        |        |        | 1.49%  |        |        |        |        |        |        |        |
| <i>Helicobacter</i>       |           |        |        |        | 10.94% | 88.61% | 98.10% | 98.53% | 94.62% |                       |        |        | 6.18%  | 9.66%  | 67.54% | 88.07% |        | 16.72% | 1.03%  |        |        |        | 4.73%  | 5.44%  |        |        |        |
| <i>Lachnoanaerobaculu</i> |           |        |        |        |        | 0.14%  |        |        |        |                       |        |        |        |        |        |        |        |        |        |        |        |        |        |        |        | 0.11%  |        |
| <i>Lactobacillus</i>      |           |        |        |        |        |        |        |        |        |                       |        |        |        |        |        |        |        |        |        | 2.57%  | 21.34% |        | 41.78% | 54.97% |        | 23.23% |        |
| <i>Lactococcus</i>        |           |        |        |        |        |        |        |        |        |                       |        |        |        |        |        |        |        |        |        |        |        |        |        |        |        | 0.77%  |        |
| <i>Leclercia</i>          |           | 21.11% | 30.03% |        |        | 0.18%  |        |        |        | 9.77%                 |        |        |        |        |        |        | 27.94% |        | 21.24% | 17.22% |        |        |        | 0.19%  |        |        |        |
| <i>Leptotrichia</i>       |           |        |        |        |        | 0.18%  |        |        |        |                       |        |        |        |        |        |        |        |        |        |        | 1.96%  |        | 1.79%  |        |        |        |        |
| <i>Megasphaera</i>        |           |        |        |        |        |        |        |        |        |                       |        |        |        |        |        |        |        |        |        |        |        | 1.29%  |        |        |        |        |        |
| <i>Methylobacterium</i>   |           |        |        |        |        |        |        |        |        |                       |        |        |        | 2.35%  |        |        |        |        |        |        |        |        |        |        |        |        |        |
| <i>Neisseria</i>          | 7.30%     | 1.68%  | 1.04%  |        |        | 0.20%  |        |        |        |                       |        |        | 1.20%  | 4.26%  |        |        |        |        |        |        |        | 8.30%  |        |        |        | 0.17%  |        |
| <i>Paracoccus</i>         |           |        |        | 1.27%  |        |        |        |        |        | 26.82%                |        |        |        |        |        |        |        |        |        |        |        |        |        |        |        |        |        |
| <i>Parvimonas</i>         |           |        |        |        |        |        |        |        |        |                       |        |        |        |        |        |        |        |        |        |        | 4.24%  |        |        |        |        |        |        |
| <i>Peptoniphilus</i>      |           |        |        |        |        | 0.10%  |        |        |        |                       |        |        |        |        |        |        |        |        |        |        |        |        |        |        |        |        |        |
| <i>Peptostreptococcus</i> |           |        |        |        |        |        |        |        |        |                       | 1.51%  |        |        |        |        |        |        |        |        |        |        |        |        |        |        |        |        |
| <i>Phreatobacter</i>      |           |        |        |        |        |        |        |        |        |                       |        |        |        |        |        |        |        |        |        |        |        |        | 1.81%  |        |        |        |        |
| <i>Phyllobacterium</i>    |           |        |        | 2.08%  |        |        |        |        |        |                       |        |        |        |        |        |        |        |        |        |        |        |        |        |        |        |        |        |
| <i>Porphyromonas</i>      | 2.77%     |        | 1.54%  |        |        | 0.12%  |        |        |        |                       |        |        |        | 1.44%  |        |        |        |        |        |        | 6.47%  | 5.66%  |        | 0.19%  |        |        |        |
| <i>Prevotella</i>         | 9.89%     | 8.38%  | 2.28%  | 0.65%  | 6.71%  | 2.56%  |        |        |        |                       | 46.93% | 3.30%  | 34.65% | 20.25% |        |        | 1.07%  |        | 2.75%  | 7.29%  | 17.03% | 19.29% | 6.13%  | 1.14%  | 1.39%  | 3.64%  |        |
| <i>Pseudomonas</i>        | 3.05%     |        |        |        | 1.62%  |        |        |        |        |                       |        |        |        | 1.18%  |        |        |        |        |        |        |        |        |        |        |        |        |        |
| <i>Ralstonia</i>          | 2.98%     |        |        | 1.50%  | 2.30%  |        |        |        |        |                       |        |        |        | 3.31%  |        |        |        |        |        |        |        | 2.62%  |        |        |        |        |        |
| <i>Rhizobium</i>          |           |        |        |        |        |        |        |        |        |                       |        |        |        | 8.17%  |        |        |        |        |        |        |        |        |        |        |        |        |        |
| <i>Rothia</i>             |           |        |        |        | 3.44%  |        |        |        |        |                       |        |        |        |        |        |        |        |        |        |        | 1.63%  | 1.11%  |        |        |        |        |        |
| <i>Selenomonas</i>        |           |        |        |        |        |        |        |        |        |                       |        |        |        |        |        |        |        |        |        |        |        |        |        |        |        | 1.36%  |        |
| <i>Sphingomonas</i>       | 1.40%     |        |        | 13.29% |        |        |        |        |        | 2.65%                 |        |        |        |        | 5.39%  |        |        | 5.70%  |        | 12.44% |        |        |        |        |        |        |        |
| <i>Stenotrophomonas</i>   |           |        |        | 1.60%  |        |        |        |        |        |                       |        |        |        |        |        |        |        |        |        |        |        |        |        |        |        |        |        |
| <i>Stomatobaculum</i>     |           |        |        |        |        |        |        |        |        |                       |        |        |        | 2.23%  |        |        |        |        |        |        |        |        |        |        |        |        | 0.16%  |
| <i>Streptococcus</i>      | 3.64%     | 1.65%  |        |        | 19.31% | 0.64%  |        |        |        |                       |        | 1.09%  | 10.12% | 1.73%  | 7.07%  |        | 1.25%  | 12.63% | 4.95%  | 1.13%  |        | 12.18% | 12.22% | 8.94%  | 0.56%  |        | 0.17%  |
| <i>Tepidimonas</i>        |           |        |        |        | 2.20%  |        |        |        |        |                       |        |        |        |        |        |        |        |        |        |        |        |        |        |        |        |        |        |
| <i>Treponema</i>          |           |        |        |        |        |        |        |        |        |                       |        |        |        |        |        |        |        |        |        |        |        |        |        |        |        | 9.37%  |        |
| <i>Veillonella</i>        | 1.38%     |        |        |        | 6.41%  | 0.30%  |        |        |        |                       | 23.32% |        | 9.60%  | 4.47%  |        |        |        |        |        |        | 5.12%  | 7.08%  | 6.62%  | 0.21%  |        |        | 0.47%  |
| <i>Xanthomonas</i>        |           |        |        |        |        |        |        |        |        |                       |        |        |        |        |        |        |        |        | 1.66%  |        |        |        |        |        |        |        |        |

Table S2. The percentages of bacteria species enriched in microbiota of gastric cancer patients

| strain                           | gastritis |       |       |       |        |        |        |        |        | intestinal metaplasia |       |       |       |       |        |        | cancer |       |       |       |        |       |       |       |       |        |        |
|----------------------------------|-----------|-------|-------|-------|--------|--------|--------|--------|--------|-----------------------|-------|-------|-------|-------|--------|--------|--------|-------|-------|-------|--------|-------|-------|-------|-------|--------|--------|
| <i>Helicobacter pylori</i>       | 0.01%     | 0.01% | 0.02% | 0.32% | 10.94% | 88.61% | 94.61% | 98.10% | 98.53% | 0.01%                 | 0.03% | 0.08% | 6.18% | 9.66% | 67.54% | 88.07% | 0.00%  | 0.24% | 0.03% | 0.04% | 0.04%  | 0.80% | 0.93% | 1.03% | 4.73% | 5.44%  | 16.72% |
| <i>Clostridium colicanis</i>     | 0.00%     | 0.02% | 0.01% | 0.00% | 0.00%  | 0.00%  | 0.00%  | 0.00%  | 0.00%  | 0.00%                 | 0.00% | 0.00% | 0.00% | 0.00% | 0.00%  | 0.00%  | 0.00%  | 0.00% | 0.00% | 0.00% | 52.18% | 3.67% | 0.15% | 0.23% | 0.00% | 24.10% | 0.00%  |
| <i>Fusobacterium canifelinum</i> | 0.00%     | 0.00% | 0.00% | 0.00% | 1.44%  | 0.02%  | 0.00%  | 0.00%  | 0.00%  | 0.00%                 | 0.00% | 0.00% | 0.23% | 0.00% | 0.00%  | 0.00%  | 34.08% | 1.59% | 0.00% | 0.00% | 0.03%  | 0.00% | 0.00% | 0.37% | 0.31% | 0.02%  | 0.00%  |
| <i>Fusobacterium nucleatum</i>   | 0.00%     | 0.16% | 0.07% | 1.38% | 0.64%  | 0.09%  | 0.00%  | 0.00%  | 0.02%  | 0.00%                 | 0.00% | 0.04% | 0.69% | 0.37% | 0.00%  | 0.01%  | 9.41%  | 5.25% | 0.00% | 4.32% | 3.53%  | 0.00% | 0.00% | 0.44% | 0.16% | 0.22%  | 0.12%  |
| <i>Lactobacillus gasseri</i>     | 0.00%     | 0.00% | 0.00% | 0.00% | 0.04%  | 0.00%  | 0.00%  | 0.00%  | 0.00%  | 0.00%                 | 0.00% | 0.00% | 0.00% | 0.00% | 0.00%  | 0.00%  | 0.02%  | 0.04% | 6.03% | 0.32% | 6.95%  | 0.72% | 0.00% | 0.00% | 2.07% | 0.00%  | 0.00%  |
| <i>Lactobacillus reuteri</i>     | 0.00%     | 0.00% | 0.00% | 0.00% | 0.02%  | 0.00%  | 0.00%  | 0.00%  | 0.00%  | 0.00%                 | 0.00% | 0.00% | 0.00% | 0.00% | 0.00%  | 0.00%  | 0.72%  | 0.01% | 2.29% | 0.25% | 0.68%  | 0.07% | 0.15% | 0.00% | 5.02% | 0.00%  | 0.00%  |
| <i>Cc+Fn</i>                     | 0.00%     | 0.19% | 0.08% | 1.38% | 0.64%  | 0.09%  | 0.00%  | 0.00%  | 0.02%  | 0.00%                 | 0.00% | 0.04% | 0.69% | 0.37% | 0.00%  | 0.01%  | 9.41%  | 5.25% | 0.00% | 4.32% | 55.71% | 3.67% | 0.15% | 0.66% | 0.16% | 24.32% | 0.12%  |
| <i>Cc+Fc+Fn</i>                  | 0.00%     | 0.19% | 0.08% | 1.38% | 2.08%  | 0.11%  | 0.00%  | 0.00%  | 0.02%  | 0.00%                 | 0.00% | 0.04% | 0.92% | 0.37% | 0.00%  | 0.01%  | 43.49% | 6.84% | 0.00% | 4.32% | 55.74% | 3.67% | 0.15% | 1.03% | 0.47% | 24.34% | 0.12%  |
| <i>Cc+Fc+Fn+Lg+Lr</i>            | 0.00%     | 0.19% | 0.08% | 1.38% | 2.14%  | 0.12%  | 0.00%  | 0.00%  | 0.02%  | 0.00%                 | 0.00% | 0.04% | 0.92% | 0.37% | 0.00%  | 0.01%  | 44.23% | 6.89% | 8.32% | 4.89% | 63.38% | 4.47% | 0.30% | 1.03% | 7.56% | 24.34% | 0.12%  |

Abbreviation: *Cc*, *Clostridium colicanis*; *Fc*, *Fusobacteriumcanifelinum*; *Fn*, *Fusobacteriumnucleatum*; *Lg*, *Lactobacillus gasseri*; *Lr*, *Lactobacillus reuteri*
